# Supplementary material for: Decreased Interhemispheric Functional Connectivity and Its Associations with Clinical Correlates following Traumatic Brain Injury
Source: Hindawi journal article supplement (doi:10.1155/2022/3408660), 2022-01-01
Supplement: f1 [file 3408660.f1.pdf]

| ID     | Education | Head Motion | TIV    | Anxiety | Depression |
|--------|-----------|-------------|--------|---------|------------|
| TBI_01 | 15        | 0.08        | 1455   | 2       | 1          |
| TBI_02 | 15        | 0.07        | 1634.1 | 9       | 4          |
| TBI_03 | 15        | 0.07        | 1556.4 | 2       | 0          |
| TBI_04 | 6         | 0.06        | 1534.1 | 6       | 4          |
| TBI_05 | 1         | 0.13        | 1332.6 | 18      | 16         |
| TBI_06 | 6         | 0.09        | 1378.8 | 16      | 18         |
| TBI_07 | 16        | 0.1         | 1424.1 | 8       | 7          |
| TBI_08 | 9         | 0.11        | 1278.4 | 1       | 0          |
| TBI_09 | 12        | 0.12        | 1564.3 | 10      | 6          |
| TBI_10 | 8         | 0.12        | 1509.1 | 4       | 8          |
| TBI_11 | 5         | 0.11        | 1404.8 | 5       | 3          |
| TBI_12 | 9         | 0.2         | 1485.5 | 14      | 19         |
| TBI_13 | 9         | 0.14        | 1454.5 | 6       | 0          |
| TBI_14 | 2         | 0.14        | 1335.8 | 1       | 5          |
| TBI_15 | 5         | 0.14        | 1340.1 | 11      | 13         |
| TBI_16 | 9         | 0.16        | 1509.4 | 5       | 2          |
| TBI_17 | 2         | 0.18        | 1553.9 | 6       | 6          |
| TBI_18 | 9         | 0.1         | 1729.6 | 7       | 10         |
| TBI_19 | 16        | 0.04        | 1443.8 | 4       | 1          |
| TBI_20 | 12        | 0.19        | 1586.8 | 5       | 3          |
| TBI_21 | 9         | 0.06        | 1520.9 | 13      | 9          |
| TBI_22 | 5         | 0.2         | 1454.8 | 14      | 11         |
| TBI_23 | 5         | 0.17        | 1649.2 | 12      | 15         |
| TBI_24 | 16        | 0.07        | 1530.3 | 7       | 9          |
| TBI_25 | 9         | 0.16        | 1387.7 | 12      | 6          |
| TBI_26 | 9         | 0.1         | 1333.1 | 7       | 5          |
| TBI_27 | 9         | 0.1         | 1757.4 | 6       | 10         |
| TBI_28 | 12        | 0.06        | 1639.4 | 17      | 7          |
| TBI_29 | 12        | 0.11        | 1486.9 | 5       | 10         |
| TBI_30 | 9         | 0.13        | 1331.3 | 14      | 21         |
| HC_01  | 15        | 0.1         | 1667.2 | 6       | 4          |
| HC_02  | 9         | 0.13        | 1622   | 4       | 5          |
| HC_03  | 16        | 0.09        | 1502.8 | 2       | 0          |
| HC_04  | 9         | 0.09        | 1545   | 4       | 3          |
| HC_05  | 9         | 0.04        | 1426.6 | 7       | 4          |
| HC_06  | 9         | 0.17        | 1291.5 | 2       | 5          |
| HC_07  | 9         | 0.18        | 1553.2 | 3       | 6          |
| HC_08  | 2         | 0.2         | 1405.2 | 4       | 1          |
| HC_09  | 16        | 0.1         | 1645.6 | 4       | 2          |
| HC_10  | 9         | 0.12        | 1449.3 | 6       | 2          |
| HC_11  | 9         | 0.08        | 1392   | 7       | 2          |
| HC_12  | 9         | 0.08        | 1621.7 | 0       | 0          |
| HC_13  | 2         | 0.07        | 1708.8 | 3       | 0          |
| HC_14  | 8         | 0.18        | 1608.6 | 7       | 1          |
| HC_15  | 12        | 0.07        | 1605.3 | 1       | 4          |
| HC_16  | 12        | 0.04        | 1317.8 | 5       | 3          |
| HC_17  | 5         | 0.1         | 1629   | 11      | 6          |
| HC_18  | 9         | 0.09        | 1426.1 | 6       | 7          |
| HC_19  | 5         | 0.2         | 1343.9 | 3       | 1          |
| HC_20  | 9         | 0.1         | 1637.2 | 3       | 7          |
| HC_21  | 9         | 0.17        | 1630.8 | 3       | 2          |
| HC_22  | 16        | 0.08        | 1920.9 | 4       | 1          |



| L_MidFroGy_VB | R_MidFroGy_VB | L_MidTemGy_V | R_MidTemGy_V | L_Frontal_Mid_O | R_Frontal_Mid_O |
|---------------|---------------|--------------|--------------|-----------------|-----------------|
| M             | M             | BM           | BM           | rb_FC           | rb_FC           |
| 17.73         | 19.72         | 12.12        | 12.89        | 0.17            | 0.19            |
| 19.36         | 19.91         | 15.85        | 15.61        | 0.41            | 0.43            |
| 19.98         | 17.94         | 13.53        | 13.79        | 0.39            | 0.41            |
| 18.29         | 19.51         | 12.63        | 13.28        | -0.03           | 0.06            |
| 14.17         | 14.86         | 12.18        | 12.07        | 0.36            | 0.4             |
| 13.63         | 13.97         | 10.75        | 11.43        | 0.2             | 0.23            |
| 18.29         | 16.78         | 15.16        | 15.33        | 0.42            | 0.45            |
| 12.83         | 13.89         | 6.47         | 10.9         | 0.26            | 0.33            |
| 18.24         | 16.27         | 13.84        | 14.37        | 0.42            | 0.42            |
| 17.21         | 16.86         | 13.78        | 15.09        | 0.26            | 0.28            |
| 16.7          | 15.71         | 12.3         | 13.24        | 0.1             | 0.14            |
| 8.05          | 19.93         | 9.42         | 15.38        | 0.42            | 0.39            |
| 16.55         | 16.99         | 10.6         | 12.52        | 0.19            | 0.2             |
| 13.32         | 13.15         | 10.11        | 11.48        | 0.15            | 0.1             |
| 15.4          | 13.97         | 11.43        | 10.86        | 0.26            | 0.25            |
| 17.43         | 7.45          | 12.33        | 13.1         | 0.03            | 0.11            |
| 14.4          | 14.24         | 11.69        | 12.35        | 0.29            | 0.26            |
| 21.84         | 21.39         | 15.04        | 15.22        | 0.41            | 0.42            |
| 16.54         | 16.41         | 10.81        | 11.82        | 0.36            | 0.37            |
| 18.03         | 16.63         | 15.45        | 15.75        | 0.46            | 0.46            |
| 18.48         | 16.68         | 13.37        | 15.32        | 0.46            | 0.42            |
| 13.62         | 19.61         | 11.58        | 10.39        | 0.16            | 0.14            |
| 16.32         | 17.01         | 11.67        | 11.96        | 0.56            | 0.58            |
| 19.47         | 18.19         | 12.57        | 14.1         | 0.44            | 0.46            |
| 14.26         | 15.14         | 12.36        | 13.83        | 0.6             | 0.7             |
| 16.31         | 16.25         | 11.97        | 11.49        | 0.44            | 0.42            |
| 23.26         | 25.95         | 15.68        | 18.35        | 0.63            | 0.6             |
| 18.23         | 19.06         | 13.61        | 13.73        | 0.47            | 0.46            |
| 17.39         | 16.82         | 13.14        | 12.51        | 0.48            | 0.45            |
| 16.84         | 16.75         | 13.81        | 14.2         | 0.61            | 0.61            |
| 21.86         | 22.06         | 16.48        | 16.02        | 0.63            | 0.65            |
| 22.38         | 22.07         | 15.39        | 16.41        | 0.53            | 0.52            |
| 15.81         | 16.19         | 12.24        | 13.75        | 0.43            | 0.47            |
| 17.72         | 17.92         | 13.34        | 14.7         | 0.81            | 0.83            |
| 20.21         | 18.45         | 12.35        | 12.77        | 0.78            | 0.81            |
| 14.68         | 16.33         | 11.87        | 11.82        | 1.08            | 1.16            |
| 16.35         | 18.14         | 12.87        | 14.62        | 0.79            | 0.82            |
| 15.77         | 16.15         | 12.75        | 12.2         | 0.63            | 0.71            |
| 19.45         | 20.95         | 14.45        | 13.57        | 0.69            | 0.68            |
| 16.66         | 17.12         | 12.16        | 13.06        | 0.59            | 0.59            |
| 14.97         | 15.1          | 13.16        | 11.54        | 0.53            | 0.54            |
| 18.43         | 20.68         | 14.79        | 15.07        | 0.58            | 0.63            |
| 19.15         | 19.89         | 15.37        | 15.7         | 0.73            | 0.74            |
| 20.32         | 19.52         | 16.18        | 16.54        | 0.78            | 0.81            |
| 21.15         | 20.84         | 15.11        | 15.78        | 0.49            | 0.5             |
| 15.91         | 16.52         | 12.37        | 12.75        | 0.6             | 0.58            |
| 21.69         | 21.69         | 17.52        | 16.05        | 0.68            | 0.7             |
| 17.4          | 17.05         | 13.22        | 14.6         | 0.99            | 1.01            |
| 15.66         | 15.39         | 12.73        | 12.88        | 0.49            | 0.47            |
| 17.58         | 18.98         | 14.29        | 14.4         | 0.7             | 0.7             |
| 18.67         | 18.58         | 13.64        | 14.06        | 0.47            | 0.5             |
| 23.63         | 23.94         | 17.93        | 17.87        | 0.45            | 0.5             |

| L_Temoral<br>_Mid_FC | R_Temoral<br>_Mid_FC | pcc_FA | mcc_FA | acc_FA   |
|----------------------|----------------------|--------|--------|----------|
| 0.38                 | 0.36                 | 0.685  | 0.583  | 0.518806 |
| 0.42                 | 0.48                 | 0.6732 | 0.558  | 0.513717 |
| 0.59                 | 0.64                 | 0.6922 | 0.56   | 0.517822 |
| 0.43                 | 0.44                 | 0.6575 | 0.535  | 0.443839 |
| 0.6                  | 0.61                 | 0.6904 | 0.604  | 0.536048 |
| 0.28                 | 0.41                 | 0.6776 | 0.544  | 0.504433 |
| 0.51                 | 0.49                 | 0.6771 | 0.57   | 0.520752 |
| 0.12                 | 0.07                 | 0.615  | 0.532  | 0.473379 |
| 0.41                 | 0.41                 | 0.6976 | 0.589  | 0.547117 |
| 0.29                 | 0.32                 | 0.698  | 0.582  | 0.537361 |
| 0.1                  | 0.13                 | 0.6471 | 0.534  | 0.490778 |
| 0.06                 | 0.1                  | 0.6911 | 0.602  | 0.525392 |
| 0.58                 | 0.58                 | 0.6704 | 0.584  | 0.511329 |
| 0.32                 | 0.38                 | 0.6777 | 0.531  | 0.51165  |
| 0.34                 | 0.4                  | 0.6392 | 0.513  | 0.453801 |
| 0.59                 | 0.59                 | 0.6392 | 0.534  | 0.476529 |
| 0.75                 | 0.82                 | 0.7177 | 0.618  | 0.545526 |
| 0.32                 | 0.46                 | 0.6653 | 0.586  | 0.519662 |
| 0.39                 | 0.39                 | 0.6974 | 0.607  | 0.556411 |
| 0.28                 | 0.28                 | 0.6609 | 0.577  | 0.517703 |
| 0.46                 | 0.45                 | 0.6825 | 0.633  | 0.549532 |
| 0.18                 | 0.21                 | 0.6603 | 0.545  | 0.397023 |
| 0.3                  | 0.29                 | 0.6509 | 0.564  | 0.514586 |
| 0.18                 | 0.19                 | 0.6814 | 0.568  | 0.521151 |
| 0.29                 | 0.38                 | 0.6903 | 0.583  | 0.524574 |
| 0.19                 | 0.2                  | 0.6853 | 0.591  | 0.511577 |
| 0.04                 | 0                    | 0.7093 | 0.589  | 0.572165 |
| 0.51                 | 0.53                 | 0.6818 | 0.576  | 0.508848 |
| 0.49                 | 0.56                 | 0.688  | 0.586  | 0.533666 |
| 0.38                 | 0.45                 | 0.7008 | 0.593  | 0.517377 |
| 0.6                  | 0.66                 | 0.6948 | 0.634  | 0.55803  |
| 0.66                 | 0.71                 | 0.6998 | 0.613  | 0.544135 |
| 0.7                  | 0.71                 | 0.7237 | 0.656  | 0.590228 |
| 0.59                 | 0.6                  | 0.7182 | 0.638  | 0.57546  |
| 0.49                 | 0.51                 | 0.6937 | 0.58   | 0.533831 |
| 0.78                 | 0.74                 | 0.6732 | 0.602  | 0.533382 |
| 0.8                  | 0.85                 | 0.6893 | 0.619  | 0.548846 |
| 0.81                 | 0.8                  | 0.7076 | 0.587  | 0.553767 |
| 0.65                 | 0.69                 | 0.6959 | 0.584  | 0.545993 |
| 0.79                 | 0.78                 | 0.7318 | 0.612  | 0.573029 |
| 0.61                 | 0.65                 | 0.6986 | 0.59   | 0.566262 |
| 1.07                 | 1.1                  | 0.6758 | 0.537  | 0.511563 |
| 0.63                 | 0.74                 | 0.6938 | 0.586  | 0.548751 |
| 0.42                 | 0.5                  | 0.6886 | 0.617  | 0.53842  |
| 0.64                 | 0.63                 | 0.6758 | 0.578  | 0.530425 |
| 0.34                 | 0.39                 | 0.6824 | 0.572  | 0.526686 |
| 0.76                 | 0.84                 | 0.7074 | 0.628  | 0.564704 |
| 0.73                 | 0.79                 | 0.6985 | 0.596  | 0.54614  |
| 0.35                 | 0.34                 | 0.7197 | 0.625  | 0.549638 |
| 0.8                  | 0.78                 | 0.722  | 0.637  | 0.580797 |
| 0.49                 | 0.57                 | 0.657  | 0.584  | 0.524037 |
| 0.64                 | 0.65                 | 0.715  | 0.652  | 0.568981 |
